# Supplementary material for: DNA Glycosylases Involved in Base Excision Repair May Be Associated with Cancer Risk in BRCA1 and BRCA2 Mutation Carriers
Source: PLoS Genet. 2014 Apr 3;10(4):e1004256. doi: 10.1371/journal.pgen.1004256 (PMC3974638; doi:10.1371/journal.pgen.1004256)
Supplement: Table S1 — Association with breast cancer for the 94 SNPs selected for analysis in stage I. (XLS) [file pgen.1004256.s002.xls]

## Sheet: Weighted
	Table S1: Association with breast cancer for the 94 SNPs selected for analysis in stage I.
							BRCA1 mutation carriers									BRCA2 mutation carriers
	Gene	SNP ID	Alleles	Minor	MAFa		pHWEb	N	HRc per allele	p-value per allele	HR heterozygote	P-value Heterozygote	HR homozygote	P-value Homozygote		pHWE	N	HR per allele	p-value per allele	HR heterozygote	P-value Heterozygote	HR homozygote	P-value Homozygote
65	XRCC1	rs1799782	CT	T	0.0617284		0.180497	964	0.990073	0.948654	0.98785	0.94726	0.993778	0.990525		1	818	1.666	0.0492418	1.58061	0.0996122	6.5221	6.426e-07
89	XRCC1	rs2854510	CT	C	0.226992		0.306857	963	1.08437	0.441102	0.98778	0.921961	1.50897	0.134472		0.0502693	819	0.799331	0.114836	0.794747	0.176278	0.651709	0.275641
121	XRCC1	rs3213344	CG	G	0.0626053		0.599498	964	0.985588	0.925201	1.00207	0.991022	0.870418	0.797061		0.754113	817	1.39974	0.169413	1.59045	0.0858933	0.814381	0.852531
61	XRCC1	rs2854509	AC	A	0.18557		0.840036	962	0.998349	0.98834	0.838858	0.211869	1.42546	0.14783		0.0813015	819	1.20358	0.180106	1.21539	0.299283	1.41478	0.306106
86	XRCC1	rs3213282	CG	C	0.453098		0.89586	948	0.988781	0.891666	0.953182	0.737768	0.984371	0.924462		0.943518	813	0.950889	0.662436	0.987552	0.948659	0.896018	0.63576
2	XRCC1	rs939461	AC	C	0.0754126		0.322594	946	0.962137	0.787933	1.0736	0.678145	0.406413	0.183416		0.222874	813	1.08777	0.712758	1.02566	0.912074	11.7448	1.189e-05
118	UNG	rs246079	AG	G	0.446067		0.106223	964	0.929851	0.383635	0.989229	0.938817	0.854596	0.354189		0.774211	817	1.09548	0.429694	1.10359	0.580719	1.19723	0.445285
67	UNG	rs7978946	CT	T	0.209904		0.25887	961	0.962632	0.699619	0.895329	0.383665	1.11137	0.679403		1	816	0.972142	0.848832	0.815282	0.246469	1.6856	0.145792
120	UNG	rs2569987	AG	G	0.141134		0.0572002	964	1.08566	0.486219	1.01723	0.908026	1.42321	0.313405		1	818	0.821942	0.224626	0.760019	0.14733	0.9612	0.936098
111	UNG	rs34259	CG	C	0.217416		0.100352	964	0.917781	0.397379	1.02813	0.824251	0.66641	0.154171		0.746992	816	1.22121	0.132446	1.22718	0.235676	1.47027	0.347719
37	UNG	rs3847954	CT	C	0.196901		0.843684	959	0.94742	0.625624	1.01166	0.930174	0.755909	0.402274		0.90778	816	1.68578	0.00014719	1.77068	0.00107531	2.44094	0.03987
104	TDG	rs4135061	AG	G	0.264706		0.21395	942	1.03698	0.729713	0.93958	0.637568	1.28232	0.316864		0.855868	811	1.15486	0.308707	1.02764	0.876849	1.62781	0.165581
109	TDG	rs3751206	AG	A	0.0671217		0.43112	950	1.14684	0.410788	1.13037	0.503077	1.49666	0.568968		0.571675	810	0.764322	0.291197	0.774783	0.322482	5.041e-19	.
79	TDG	rs3751209	AG	A	0.233446		0.470311	965	0.986506	0.894402	1.0047	0.97003	0.934089	0.811479		0.205246	818	0.855638	0.265118	0.879178	0.46433	0.6768	0.316495
102	TDG	rs1866074	CT	T	0.477427		0.476202	956	0.981526	0.817361	1.17553	0.236476	0.946308	0.744484		0.206092	816	0.966168	0.771629	1.00586	0.974439	0.926839	0.753091
57	TDG	rs4135128	CG	C	0.0816267		0.520957	913	1.28705	0.0947457	1.23068	0.2119	2.16568	0.15299		0.466494	797	0.805459	0.34411	0.857141	0.528326	1.227e-19	.
91	TDG	rs2723875	AC	C	0.245362		0.787788	890	1.08887	0.403798	1.04885	0.72069	1.28503	0.35325		1	782	1.14916	0.322814	1.12524	0.50542	1.37088	0.389601
26	TDG	rs3763995	AG	A	0.0576815		1	960	0.727694	0.0989824	0.753645	0.160257	8.381e-20	.		0.190868	817	1.42339	0.100001	1.47272	0.132741	1.64651	0.552313
12	TDG	rs4135106	CT	C	0.0952381		1	967	0.842318	0.245016	0.908381	0.548916	0.289522	0.0854943		0.0734946	818	1.00782	0.964963	1.18833	0.428957	0.546708	0.311809
22	TDG	rs4135054	CT	T	0.133558		1	964	0.806824	0.109012	0.818623	0.185813	0.60468	0.304983		0.887117	818	0.787272	0.133069	0.815862	0.283139	0.49782	0.231571
81	TDG	rs10861152	AG	A	0.357865		1	962	1.07767	0.419629	0.936387	0.614237	1.31369	0.152335		0.170242	818	1.18373	0.196265	1.09722	0.601936	1.49344	0.153003
16	TDG	rs4135087	CT	T	0.0524397		0.0252467	964	1.96521	4.087e-05	1.73236	0.00968823	6.92832	4.108e-14		0.427968	819	1.41959	0.198196	1.25763	0.43584	7.19231	3.776e-06
85	TDG	rs2254064	AG	A	0.18192		0.10379	962	1.15982	0.190537	1.10319	0.481319	1.62216	0.172768		0.0606402	819	1.08252	0.623416	0.923234	0.652032	2.72646	0.0417217
69	TDG	rs172814	AG	G	0.149296		0.126605	958	1.06947	0.575683	1.08426	0.561565	1.05459	0.910959		0.890112	817	1.18302	0.32236	0.953631	0.8037	4.41873	0.00058016
23	TDG	rs167715	CT	C	0.11402		0.270883	959	1.0471	0.743961	1.00683	0.9625	1.61435	0.498853		0.0773933	817	1.04389	0.819396	1.10253	0.614004	0.631228	0.632924
129	SMUG1	rs2279400	CT	C	0.488732		0.245698	960	1.04045	0.63178	0.933927	0.642705	1.08496	0.612641		0.83318	815	0.872041	0.245948	0.895614	0.536763	0.757703	0.246696
62	SMUG1	rs10161263	CT	T	0.321429		0.0945403	960	0.978265	0.812625	0.947858	0.677327	0.989756	0.958981		0.287552	818	0.877962	0.299062	0.727831	0.0475081	1.00479	0.986555
14	POLB	rs3136711	CT	C	0.0720695		0.209066	964	0.816019	0.215615	0.949795	0.779888	0.168176	0.0963394		0.310492	819	0.894322	0.603189	0.86808	0.528067	1.7398	0.0669253
55	POLB	rs3136717	CT	C	0.0943284		0.106997	921	0.826684	0.213524	0.841643	0.313695	0.60295	0.401065		0.415003	754	0.710291	0.098128	0.611147	0.0223096	1.88	0.384479
20	POLB	rs3136811	CG	G	0.0579832		0.116614	966	0.851327	0.383924	0.957251	0.832543	0.173698	0.141907		0.0624311	819	0.641325	0.0571212	0.588063	0.0339858	0.965026	0.967107
56	PNKP	rs2257103	CT	T	0.434906		0.46255	946	0.986246	0.874331	1.00331	0.981715	0.96815	0.854673		0.0661442	814	0.968976	0.796704	0.903273	0.576772	0.954831	0.85045
123	PNKP	rs2353005d	CT	T	0.152002		0.00189554	960	1.02459	0.835063	1.12285	0.433317	0.82476	0.558689		1	815	1.04976	0.761755	0.929841	0.69525	2.11652	0.080163
100	PARP2	rs878156	CT	C	0.110382		0.627339	943	0.811568	0.153863	0.749194	0.0765655	1.09902	0.839567		1	812	1.00826	0.965034	1.12493	0.573877	0.386936	0.267801
11	PARP2	rs1760921	AG	G	0.0559933		1	961	1.03205	0.857946	1.12208	0.511538	0.138416	0.107301		0.698554	817	0.986567	0.958238	1.19906	0.531962	5.387e-20	.
68	PARP2	rs878157	CT	T	0.231872		0.163071	962	1.01255	0.897371	1.09832	0.453937	0.836406	0.521277		0.704433	818	1.3642	0.0181644	1.18587	0.307536	2.44115	0.00793846
34	PARP2	rs1713430	AG	A	0.351016		0.475922	955	0.926064	0.386634	0.91377	0.488003	0.868833	0.46814		0.878803	817	1.26144	0.0576088	1.53852	0.00913256	1.37212	0.256022
126	PARP2	rs3093930	CT	T	0.332298		0.50948	958	0.915515	0.325867	0.94964	0.676451	0.795321	0.297288		0.116562	814	1.08958	0.482385	1.47626	0.0208987	0.878907	0.667033
125	PARP2	rs2700	GT	G	0.255481		0.86313	961	0.917731	0.38045	1.04042	0.757446	0.617914	0.089729		1	818	1.37469	0.0144649	1.14419	0.424251	2.54812	0.00261995
45	PARP2	rs3093926	AG	A	0.0824916		1	965	0.835606	0.283318	0.809153	0.24859	0.921254	0.907074		1	817	1.14988	0.500229	1.02173	0.917356	17.9282	0.00011313
21	PARP1	rs3219123	CT	T	0.0606061		0.177636	964	1.16728	0.382688	1.3016	0.152194	0.693796	0.678558		0.588215	818	0.94584	0.816158	0.8748	0.590672	3.06511	0.0494155
119	PARP1	rs8679	CT	C	0.253676		0.191611	956	1.09538	0.355767	1.22553	0.117683	0.989906	0.96841		0.415146	813	0.917742	0.497282	0.945173	0.735004	0.783503	0.466064
48	PARP1	rs3219119	AT	T	0.315211		0.235434	958	1.04741	0.622829	1.04865	0.712572	1.09569	0.673476		0.622568	817	0.978441	0.841402	1.11241	0.520258	0.843301	0.512567
46	PARP1	rs747659	CT	T	0.165259		0.376951	959	0.917249	0.425664	0.967026	0.804743	0.70518	0.28035		0.341815	817	0.993431	0.963815	0.985595	0.934436	1.01841	0.96624
97	PARP1	rs6668851d	AC	C	0.238836		0.416522	960	1.0794	0.459252	0.960165	0.755943	1.44126	0.128579		1	809	0.935717	0.632142	0.84233	0.342075	1.06711	0.848452
39	PARP1	rs3219142	CT	T	0.164318		0.729662	960	0.834598	0.10986	0.867526	0.299483	0.591198	0.161584		0.895916	814	1.30992	0.0550937	1.1981	0.291812	2.36923	0.0405452
70	PARP1	rs3219110	AG	G	0.431665		0.792519	961	0.878539	0.137323	1.01465	0.919438	0.738013	0.099124		0.226006	817	1.06269	0.561472	1.21851	0.232507	1.08986	0.695982
50	PARP1	rs3219095	AG	G	0.170964		1	967	1.0187	0.860736	1.10778	0.450866	0.761374	0.445917		0.142513	817	0.977523	0.877803	1.07661	0.70511	0.740968	0.466683
32	PARP1	rs1136410	CT	C	0.147868		0.0650068	964	1.17506	0.194805	1.06137	0.689354	1.9607	0.0356954		0.592444	818	0.931237	0.61285	1.04818	0.806705	0.594911	0.260387
117	PARP1	rs1805401	CG	C	0.0530601		0.521789	963	0.860445	0.355306	0.985725	0.93839	0.156394	0.128332		0.717056	818	1.23392	0.429462	1.18878	0.523025	7.8264	8.247e-13
6	OGG1	rs125701	AG	A	0.137484		0.87652	860	0.887996	0.400795	0.893156	0.461179	0.737969	0.642329		0.658419	685	1.11796	0.510064	1.10263	0.598291	1.36166	0.663589
38	OGG1	rs2472037	AG	G	0.381342		1	961	0.895842	0.205424	0.901399	0.448454	0.79968	0.225412		0.94018	815	0.872467	0.23691	0.857558	0.370598	0.770576	0.288454
96	OGG1	rs159153d	CT	C	0.303541		0.277976	962	0.968646	0.727989	0.89253	0.380803	1.04365	0.833218		0.807246	817	1.14328	0.248832	1.24218	0.187558	1.21134	0.482181
8	OGG1	rs2269112d	CT	T	0.173901		0.502328	943	1.2954	0.0316807	1.24434	0.133205	1.92342	0.0542147		0.709475	809	1.08141	0.617335	1.08635	0.659989	1.15092	0.75974
41	OGG1	rs2072668	CG	G	0.224449		0.58424	957	1.42935	0.0120485	1.38093	0.0945844	2.15161	0.0231902		0.6065	815	0.968233	0.819211	0.972885	0.881006	0.92865	0.83314
101	OGG1	rs2304277d	AG	A	0.206264		0.92228	956	1.2523	0.037877	1.21664	0.163472	1.6803	0.0641411		0.744509	817	0.937837	0.664184	0.882675	0.48916	1.0234	0.953116
15	NTHL1	rs12447809d	GT	T	0.220723		0.0174682	934	0.90003	0.326614	0.912438	0.514263	0.790201	0.402229		0.357662	808	0.876615	0.29066	0.870479	0.408936	0.78251	0.440433
43	NTHL1	rs2516740d	GT	G	0.273468		0.624297	963	0.985782	0.885556	1.11501	0.384283	0.746589	0.2881		0.256827	816	0.86823	0.258303	0.827167	0.258418	0.819401	0.502958
40	NTHL1	rs8059880d	CT	C	0.0729108		0.129276	965	0.992203	0.966053	0.90731	0.611736	1.81696	0.530297		0.218516	818	0.680394	0.058399	0.682007	0.0716124	0.433112	0.555267
80	NEIL2	rs8191542	CG	G	0.203204		0.15453	962	0.916643	0.433379	0.872543	0.32303	0.929618	0.797208		0.598415	817	0.820195	0.14851	0.762834	0.0972072	0.85656	0.698849
127	NEIL2	rs1874546	CG	C	0.212394		0.164468	959	1.10707	0.304658	1.10253	0.450805	1.23322	0.394646		0.0277216	816	1.16765	0.280843	0.994579	0.975594	1.94529	0.0587982
64	NEIL2	rs4840583	CT	T	0.48		0.363642	956	1.07005	0.433277	1.03592	0.797356	1.15188	0.414564		0.327803	819	0.949935	0.640343	0.882729	0.512998	0.906823	0.65222
83	NEIL2	rs2686211	AT	T	0.344313		0.437684	961	1.08259	0.35943	1.13499	0.318388	1.12748	0.531623		0.529434	816	0.97433	0.81402	1.04797	0.779166	0.892528	0.629417
105	NEIL2	rs904009	GT	G	0.254775		0.619567	964	1.09289	0.367329	1.00217	0.986081	1.42301	0.13275		0.569302	817	0.897321	0.373889	0.896189	0.492602	0.807049	0.493206
5	NEIL2	rs8191663	CT	T	0.266065		0.627124	959	0.961007	0.692253	0.872116	0.278244	1.11244	0.650656		0.712956	815	0.89942	0.38823	0.886654	0.458152	0.82951	0.547543
87	NEIL2	rs1043180	CT	T	0.0919056		0.64895	961	1.09779	0.529148	1.0647	0.69098	2.32314	0.406877		0.857211	818	1.3562	0.0751328	1.24309	0.265607	3.70614	0.00539816
25	NEIL2	rs2645450d	AG	G	0.222566		0.689969	958	1.02461	0.818144	0.952406	0.70946	1.36663	0.267185		0.850354	819	1.2072	0.173475	1.08803	0.620539	1.80052	0.127641
18	NEIL2	rs8191642	AG	G	0.260464		0.868972	954	1.00833	0.935597	0.901548	0.426299	1.25379	0.340046		0.925733	815	0.982616	0.884275	1.01295	0.934343	0.918193	0.785418
	NEIL2	rs8191534	AT	T	0.258074		0.932249	904	1.11331	0.302096	1.05855	0.661	1.37017	0.233918		0.848146	769	0.876046	0.285246	0.873579	0.407606	0.771401	0.414841
88	NEIL2	rs6982453	CT	C	0.456974		0.948351	961	0.955633	0.588248	1.01259	0.931091	0.909852	0.5784		0.831668	817	0.882806	0.242803	0.976912	0.892796	0.757222	0.211353
13	NEIL2	rs4841593	CG	C	0.0911136		1	962	0.956726	0.779313	0.871478	0.406306	2.90091	0.0842782		0.388186	816	1.09751	0.637649	1.16472	0.489144	0.671699	0.707169
49	NEIL2	rs1466785d	CT	T	0.418361		0.173096	921	1.07707	0.39417	0.919658	0.558876	1.20994	0.257587		0.17068	801	1.2516	0.058462	0.993455	0.970015	1.65227	0.0324082
77	NEIL2	rs8191529	CG	C	0.0876897		0.449504	964	0.990896	0.948779	0.983543	0.91355	1.03852	0.952892		0.341072	816	0.987569	0.953742	0.825743	0.416175	3.46567	0.00740368
112	NEIL2	rs4840584	AG	A	0.0919798		0.561796	966	0.929913	0.637425	0.891045	0.466456	1.42247	0.655991		0.533013	818	1.17017	0.413968	1.2148	0.364667	0.974034	0.977585
52	NEIL2	rs904015d	AG	A	0.379096		0.892374	958	0.879396	0.1392	0.787095	0.0584604	0.842845	0.347787		0.762094	814	0.846537	0.153168	0.700827	0.041376	0.822748	0.403717
19	NEIL1	rs4462560	CG	G	0.313588		0.263167	963	1.05348	0.586945	1.1182	0.380281	1.02227	0.925436		0.0603687	818	0.739504	0.00540496	0.967827	0.850833	0.394795	0.00037762
58	MUTYH	rs3893383d	AG	A	0.117736		0.645617	906	0.962465	0.775939	0.956058	0.76412	0.967083	0.947401		0.461975	746	0.895457	0.54333	0.960739	0.855845	0.55701	0.363263
124	MUTYH	rs3219489	CG	C	0.251272		0.736625	955	0.976399	0.809612	1.01449	0.908644	0.889335	0.657824		0.633982	814	0.839769	0.157448	0.964512	0.834111	0.540027	0.0478666
82	MUTYH	rs3219474	CT	C	0.0655877		0.169643	949	0.797566	0.234772	0.759308	0.151995	5.82405	1.07e-06		1	812	1.06165	0.805076	0.999705	0.999042	12.4346	2.437e-11
33	MUTYH	rs3219487	AG	A	0.104605		0.597707	948	1.02679	0.857039	0.978306	0.886764	1.74416	0.402252		0.271859	813	0.961309	0.811118	0.967415	0.86858	0.891063	0.832772
108	MPG	rs2541622	CT	T	0.18372		0.315648	955	1.02522	0.831662	1.13812	0.327667	0.691928	0.382004		0.430031	814	1.07613	0.585834	1.16643	0.375856	0.95927	0.913844
35	MPG	rs1061438	CT	T	0.180178		0.435263	907	1.19755	0.130808	1.15758	0.285684	1.73232	0.175196		0.219792	783	1.03591	0.81083	1.03978	0.830417	1.06247	0.888841
28	MPG	rs2562154d	CG	G	0.168166		0.818703	961	1.15138	0.235761	1.1956	0.196328	1.10774	0.802597		0.800754	817	1.04284	0.788613	0.959967	0.822467	1.6187	0.326565
31	MPG	rs2541632	AG	G	0.165361		0.907205	968	1.23197	0.0766457	1.30427	0.0520529	1.1741	0.672252		0.800752	819	1.11403	0.503848	0.999018	0.995755	2.46419	0.0360187
114	MBD4	rs9821282d	AG	A	0.192004		0.222617	961	0.950333	0.625166	0.953909	0.713804	0.895951	0.703421		0.130493	815	0.875014	0.354087	0.9013	0.525933	0.662401	0.410238
106	MBD4	rs140695	AG	A	0.326502		0.612894	963	0.956849	0.603382	1.23996	0.0961887	0.720378	0.118969		0.572293	818	1.10387	0.438459	0.997672	0.988699	1.3803	0.2534
7	MBD4	rs3138373d	AG	G	0.118458		0.649253	959	1.26059	0.0625381	1.20747	0.194938	2.11265	0.0624788		0.230217	818	1.19164	0.313232	1.33491	0.124954	0.71316	0.683755
3	LIG3	rs4796030	AC	A	0.47912		0.399712	956	1.15094	0.122159	0.934399	0.644353	1.34821	0.0818016		0.8334	817	1.0396	0.7365	1.13554	0.49133	1.07548	0.75766
71	LIG3	rs3135967	AG	G	0.424242		0.947237	966	0.873489	0.122305	0.870202	0.310495	0.764302	0.134438		0.255122	816	1.03706	0.747991	1.12962	0.495118	1.05167	0.830641
59	LIG3	rs2074516	CG	C	0.109127		0.519109	949	0.95561	0.707722	1.02177	0.88189	0.655372	0.371664		0.188398	815	0.944152	0.76339	0.869072	0.470064	4.63539	0.00015476
113	LIG3	rs3135989	GT	G	0.055213		1	965	0.919272	0.674403	0.858233	0.467238	5.24609	4.137e-13		1	819	1.0008	0.997264	0.941196	0.797098	9.60246	1.398e-07
103	APEX2	rs704145d	CT	T	0.162177		0.13118	964	1.03129	0.78519	1.06721	0.63176	0.950604	0.893587		0.895108	818	0.956012	0.775797	1.02375	0.905033	0.673121	0.439883
93	APEX1	rs3136817	CT	C	0.262802		0.330639	959	0.857206	0.141142	0.845466	0.198645	0.754951	0.309192		1	818	0.823196	0.120019	0.727172	0.0615581	0.837384	0.522013
115	APEX1	rs1130409	GT	G	0.454775		0.744519	961	0.960256	0.633179	0.975763	0.860183	0.91724	0.621977		0.888306	819	0.964646	0.737439	0.911934	0.620066	0.935269	0.753368
116	APEX1	rs1760944	AC	A	0.366704		0.211165	953	0.864737	0.0831347	0.785994	0.0717842	0.798078	0.194294		0.196579	810	1.11917	0.310205	1.27215	0.184411	1.12987	0.608499
	a MAF: Minor Allele Frequency. Only those SNPs with MAF ≥ 0.05 were included in the association analysis
	b p-HWE: p-value for the deviation of Hardy Weimberg Equilibrium. Only SNPs in which the p-value was not significant were included in the association analysis.
	c HR: Hazard ratio
	d SNPs located in a neighbour gene but within an LD block comprising part of the gene of interest.
